# Supplementary material for: Allelopathic Effects of Lantana camara L. Leaf Aqueous Extracts on Germination and Seedling Growth of Capsicum annuum L. and Daucus carota L.
Source: Hindawi journal article supplement (doi:10.1155/2024/9557081), 2024-04-16
Supplement: f1 [file 9557081.f1.pdf]

Table S1. Allelopathic activity on germination of seeds

|        | 19/06/15 | 20/06/15 | 21/06/15 | 22/06/15 | 23/06/15 | 24/06/15 | 25/06/15 | 26/06/15 | 27/06/15 | 28/06/15 | 29/06/15 | 30/06/15 | 30/06/15 | 1/6/2015 | 2/6/2015 | 3/6/2015 | 4/6/2015 | 5/6/2015 | 4/6/2015 | 4/6/2015 | Total |
|--------|----------|----------|----------|----------|----------|----------|----------|----------|----------|----------|----------|----------|----------|----------|----------|----------|----------|----------|----------|----------|-------|
| DC1    |          |          | 1        | 2        | 4        | 3        |          |          |          |          |          |          |          |          |          |          |          |          |          |          | 10    |
| DC2    |          | 2        | 4        | 3        | 1        |          |          |          |          |          |          |          |          |          |          |          |          |          |          |          | 10    |
| DC3    |          | 2        | 3        | 1        | 4        |          |          |          |          |          |          |          |          |          |          |          |          |          |          |          | 10    |
| DC10   |          |          |          |          |          |          |          | 1        | 2        | 1        | 2        | 1        |          |          |          |          |          |          |          |          | 7     |
| DC10'  |          |          |          |          |          |          |          | 1        | 2        | 0        | 2        | 1        |          |          |          |          |          |          |          |          | 6     |
| DC10'' |          |          |          |          |          |          |          | 2        | 1        | 1        | 1        | 1        |          |          |          |          |          |          |          |          | 6     |
| DC15   |          |          |          |          |          |          |          | 3        | 1        | 1        | 2        | 1        |          |          |          |          |          |          |          |          | 7     |
| DC15'  |          |          |          |          |          |          |          | 1        | 1        | 2        | 2        | 1        |          |          |          |          |          |          |          |          | 6     |
| DC15'' |          |          |          |          |          |          |          | 1        | 1        | 1        | 2        | 1        |          |          |          |          |          |          |          |          | 5     |
| DC20   |          |          |          |          |          |          |          |          | 1        | 1        | 2        | 1        |          |          |          |          |          |          |          |          | 5     |
| DC20'  |          |          |          |          |          |          |          |          | 2        | 1        | 1        | 1        |          |          |          |          |          |          |          |          | 4     |
| DC20'' |          |          |          |          |          |          |          |          | 1        | 1        | 1        | 1        |          |          |          |          |          |          |          |          | 3     |
| CA1    |          |          |          |          |          |          |          |          |          |          | 1        | 2        |          |          |          |          | 1        |          |          |          | 8     |
| CA2    |          |          |          |          |          |          |          |          |          |          | 2        | 1        | 1        | 1        | 2        |          | 1        |          |          |          | 8     |
| CA3    |          |          |          |          |          |          |          |          |          |          | 1        | 1        | 1        | 3        | 1        | 2        |          |          |          |          | 9     |
| CA10   |          |          |          |          |          |          |          |          |          |          |          |          | 1        | 1        | 2        |          |          | 1        |          |          | 6     |
| CA10'  |          |          |          |          |          |          |          |          |          |          |          |          |          | 1        | 2        | 1        | 1        |          | 1        |          | 6     |
| CA10'' |          |          |          |          |          |          |          |          |          |          |          |          |          |          | 2        | 1        | 1        |          | 1        |          | 5     |
| CA15   |          |          |          |          |          |          |          |          |          |          |          |          |          |          | 1        | 1        | 2        |          | 1        |          | 5     |
| CA15'  |          |          |          |          |          |          |          |          |          |          |          |          |          |          |          | 1        | 1        |          | 2        |          | 4     |
| CA15'' |          |          |          |          |          |          |          |          |          |          |          |          |          |          |          | 2        | 1        |          | 1        |          | 4     |
| CA20   |          |          |          |          |          |          |          |          |          |          |          |          |          |          |          |          | 1        |          | 2        | 1        | 4     |
| CA20'  |          |          |          |          |          |          |          |          |          |          |          |          |          |          |          |          | 1        |          | 1        | 1        | 3     |
| CA20'' |          |          |          |          |          |          |          |          |          |          |          |          |          |          |          |          |          | 1        | 1        |          | 2     |

Table S2. Allelopathic activity on shoot and root lengths of germinating seeds

| concentration | PLANT 1 |     |     | PLANT 2 |     |     | PLANT 3 |     |     | PLANT 4 |     |     | PLANT 5 |     |   |  |
|---------------|---------|-----|-----|---------|-----|-----|---------|-----|-----|---------|-----|-----|---------|-----|---|--|
|               | S       | R   | L   | S       | R   | L   | S       | R   | L   | S       | R   | L   | S       | R   | L |  |
| DC1           | 10      | 8   | 2.5 | 2       | 7.5 | 3   | 2       | 6   | 4   | 2       | 4   | 6   | 2       | 7.5 |   |  |
| DC2           | 10      | 6   | 2.5 | 2       | 3.8 | 1.7 | 2       | 6.1 | 4   | 2       | 3.8 | 5.7 | 2       | 7.3 |   |  |
| DC3           | 10      | 4.5 | 3.5 | 2       | 5.5 | 5   | 2       | 5.3 | 6   | 2       | 6.3 | 7.2 | 2       | 6   |   |  |
| DC10          | 7       | 6.1 | 2.2 | 2       | 5.1 | 4.2 | 2       | 3.5 | 4.2 | 2       | 4.2 | 5.5 | 2       | 5.6 |   |  |
| DC10'         | 6       | 4.2 | 2.1 | 2       | 4.6 | 4.1 | 2       | 3.1 | 4.5 | 2       | 5   | 5.2 | 2       | 5.5 |   |  |
| DC10''        | 6       | 5   | 3.2 | 2       | 4.4 | 3.5 | 2       | 3.5 | 4.1 | 2       | 5.2 | 5.1 | 2       | 5.1 |   |  |
| DC15          | 7       | 4   | 2   | 2       | 4.2 | 3.2 | 2       | 3.1 | 3.1 | 2       | 4.1 | 4.5 | 2       | 4.5 |   |  |
| DC15'         | 6       | 3.7 | 1.2 | 2       | 4.1 | 2.8 | 2       | 2.7 | 2.7 | 2       | 3.7 | 4.1 | 2       | 4.7 |   |  |
| DC15''        | 5       | 3.1 | 2   | 2       | 3.5 | 2.4 | 2       | 2.5 | 2.8 | 2       | 3.8 | 3.8 | 2       | 4.6 |   |  |
| DC20          | 5       | 2.4 | 1.4 | 2       | 2.1 | 2.1 | 2       | 2   | 2.1 | 2       | 3.2 | 3.1 | 2       | 3.5 |   |  |
| DC20'         | 4       | 2   | 1.5 | 2       | 2   | 2.4 | 2       | 1.5 | 1.8 | 2       | 2.5 | 2.6 | 2       | 3.5 |   |  |
| DC20''        | 3       | 2.6 | 1.3 | 2       | 1.5 | 1.5 | 2       | 1.2 | 1.6 | 2       | 2.5 | 2.6 | 2       | 3.5 |   |  |
| CA1           | 8       | 3.4 | 1.8 | 2       | 3.2 | 1.6 | 2       | 3.3 | 1.9 | 2       | 3.1 | 2   | 2       | 3.4 |   |  |
| CA2           | 8       | 3.3 | 1.2 | 2       | 3.3 | 1.5 | 2       | 3.2 | 1.5 | 2       | 3.5 | 1.9 | 2       | 3.3 |   |  |
| CA3           | 9       | 4   | 3.2 | 2       | 4   | 3.7 | 2       | 4   | 3   | 2       | 5   | 3   | 2       | 4.1 |   |  |
| CA10          | 0       | 3.2 | 1.6 | 2       | 3.1 | 1.4 | 2       | 3.1 | 1.9 | 2       | 4   | 1.4 | 2       | 3.1 |   |  |
| CA10'         | 0       | 3.1 | 1.2 | 2       | 3   | 1.7 | 2       | 3   | 1.5 | 2       | 3.5 | 1.5 | 2       | 3.1 |   |  |
| CA10''        | 0       | 3.4 | 1.3 | 2       | 3.2 | 1.2 | 2       | 2.7 | 1.7 | 2       | 3.2 | 1.2 | 2       | 3.3 |   |  |
| CA15          | 0       | 3.1 | 1.2 | 2       | 3   | 1.1 | 2       | 3.1 | 1.5 | 2       | 3.6 | 1   | 2       | 3   |   |  |
| CA15'         | 0       | 3.1 | 1   | 2       | 2.6 | 1.1 | 2       | 2.4 | 1.4 | 2       | 3.1 | 1.1 | 2       | 3   |   |  |
| CA15''        | 0       | 3   | 1.1 | 2       | 2.7 | 1   | 2       | 2.5 | 1.2 | 2       | 2.7 | 1   | 2       | 3   |   |  |
| CA20          | 0       | 2.8 | 0.6 | 2       | 2.4 | 0.8 | 2       | 2.1 | 1.1 | 2       | 2.4 | 0.8 | 2       | 3   |   |  |
| CA20'         | 0       | 2.4 | 0.4 | 2       | 2.2 | 0.6 | 2       | 2.1 | 0.8 | 2       | 2.4 | 0.8 | 2       | 3   |   |  |
| CA20''        | 0       | 2.5 | 0.7 | 2       | 2.3 | 0.7 | 2       | 2.1 | 0.8 | 2       | 2.4 | 0.8 | 2       | 3   |   |  |
